# Supplementary material
Source: PubMed Central journal article supplement (PMC3979832)
Supplement: NIHMS531600-supplement-Supp_Figure_Legends.pdf [file NIHMS531600-supplement-Supp_Figure_Legends.pdf]

## Supplemental Figure and Table Legends

**Supplemental File 1.** Animals used in the current study. Number of animals and their genders from each BXD strain are listed for each experiment. Highlighted BXD strains represent lines that both 5-HT traits and midbrain transcriptome data were obtained.

**Supplemental Table 1.** Analysis of heritability of male blood, midbrain and diencephalon 5-HT traits. Numbers in parentheses designate the number of strains used in calculations. *P* values are calculated using one-way ANOVA F-test. Adjusted heritabilities ( $h^2$ ) are calculated using Hegmann and Possidente's method.

**Supplemental Figure 1.** Gene expression networks associated with male midbrain 5-HT traits. Genes (top 25) with highest correlations with (A) 5-HT, (B) 5-HIAA, or (C) 5-HT Turnover (TO, 5-HIAA/5-HT) are graphed separately based on the direction of correlation (green: positive; red: negative). Gene node sizes and colors represent the significance of correlation. Gene pairs with correlation coefficients (Spearman rho) above 0.5 are connected by edges (green: positive; red: negative).

**Supplemental Figure 2.** Gene expression networks associated with determinants of midbrain 5-HT synthesis, metabolism and inactivation. Genes (top 25) with highest correlations with (A) *Gch1*, (B) *Maoa*, or (C) *Slc18a2* are

graphed separately based on the direction of correlation (green: positive; red: negative). Gene node sizes and colors represent the significance of correlation. Gene pairs with correlation coefficients (Spearman rho) above 0.5 are connected by edges (green: positive; red: negative).

**Supplemental Table 2.** Analysis of gender effects in female blood, midbrain and diencephalon serotonergic traits. Numbers in parentheses designate the number of strains used in calculations. *P* values are calculated using one-way ANOVA F-test. Adjusted heritabilities ( $h^2$ ) are calculated using Hegmann and Possidente's method.

**Supplemental File 2.** Archived BXD phenotypes that have significant correlations with measured serotonergic traits separated by genders ( $P < 0.05$ , Spearman's rank test).

**Supplemental File 3.** Archived BXD phenotypes that have significant correlations with midbrain 5-HT levels (gender pooled,  $P < 0.05$ , Spearman's rank test).

**Supplemental File 4.** Archived BXD phenotypes that have significant correlations with blood 5-HT levels (gender pooled,  $P < 0.05$ , Spearman's rank test).

**Supplemental File 5.** Genes located under the quantitative loci identified by the interval mapping of midbrain 5-HT levels. Confidence interval for each QTL peak was determined by 1.5 LOD dropoff method.

**Supplemental File 6.** Genes located under the quantitative loci identified by the interval mapping of blood 5-HT levels. Confidence interval for each QTL peak was determined by 1.5 LOD dropoff method.

**Supplemental File 7.** Lists of genes whose midbrain expression significantly correlated with midbrain 5-HT traits ( $P < 0.05$ , Spearman's rank test).

**Supplemental File 8.** Lists of overlapping genes whose expression correlated with midbrain 5-HT traits and 1) exhibit similar anatomical expression pattern defined by *Tph2* and *Slc6a4* using NeuroBlast or 2) demonstrated enrichment in E12.5 developing 5-HT neurons. Original gene lists are also included as separate sheets.

**Supplemental File 9.** Lists of genes whose midbrain expression significantly correlated with diencephalon 5-HT traits ( $P < 0.05$ , Spearman's rank test).

**Supplemental File 10.** List of genes identified by interval mapping of midbrain 5-HT levels filtered by their expression correlation with midbrain 5-HT traits. Each

gene's expression in the raphe nuclei was scored by visual inspection of *in situ* data set from Allen Brain Atlas (N/A: probe not available or signal not strong enough).
